# Supplementary material for: Hierarchical MoS2–NiS nanosheet-based nanotubes@N-doped carbon coupled with ether-based electrolytes towards high-performance Na-ion batteries
Source: Royal Society of Chemistry journal article supplement (doi:10.1039/d1ta08719c), 2021-01-01
Supplement: d1ta08719c1.pdf [file d1ta08719c1.pdf]

## Electronic Supplementary Information

### **Hierarchical MoS<sub>2</sub>-NiS nanosheet-based nanotubes@N-doped carbon coupled with Ether-based electrolytes towards high-performance Na-ion Batteries**

Fan Yang<sup>a</sup>, Shige Wang<sup>a</sup>, Jieduo Guan<sup>a</sup>, Lianyi Shao<sup>a</sup>, Xiaoyan Shi<sup>a</sup>, Junjie Cai<sup>a,b\*</sup>,  
Zhipeng Sun<sup>a\*</sup>

<sup>a</sup> School of Materials and Energy, Guangzhou 510006, Guangdong University of Technology,  
Guangzhou 510006, PR China

<sup>b</sup> Xi'an Jiaotong University Suzhou Institute, Suzhou, Suzhou 215123, PR China

Corresponding Author: [caijunjie@gdut.edu.cn](mailto:caijunjie@gdut.edu.cn) and [zpsunxj@163.com](mailto:zpsunxj@163.com)

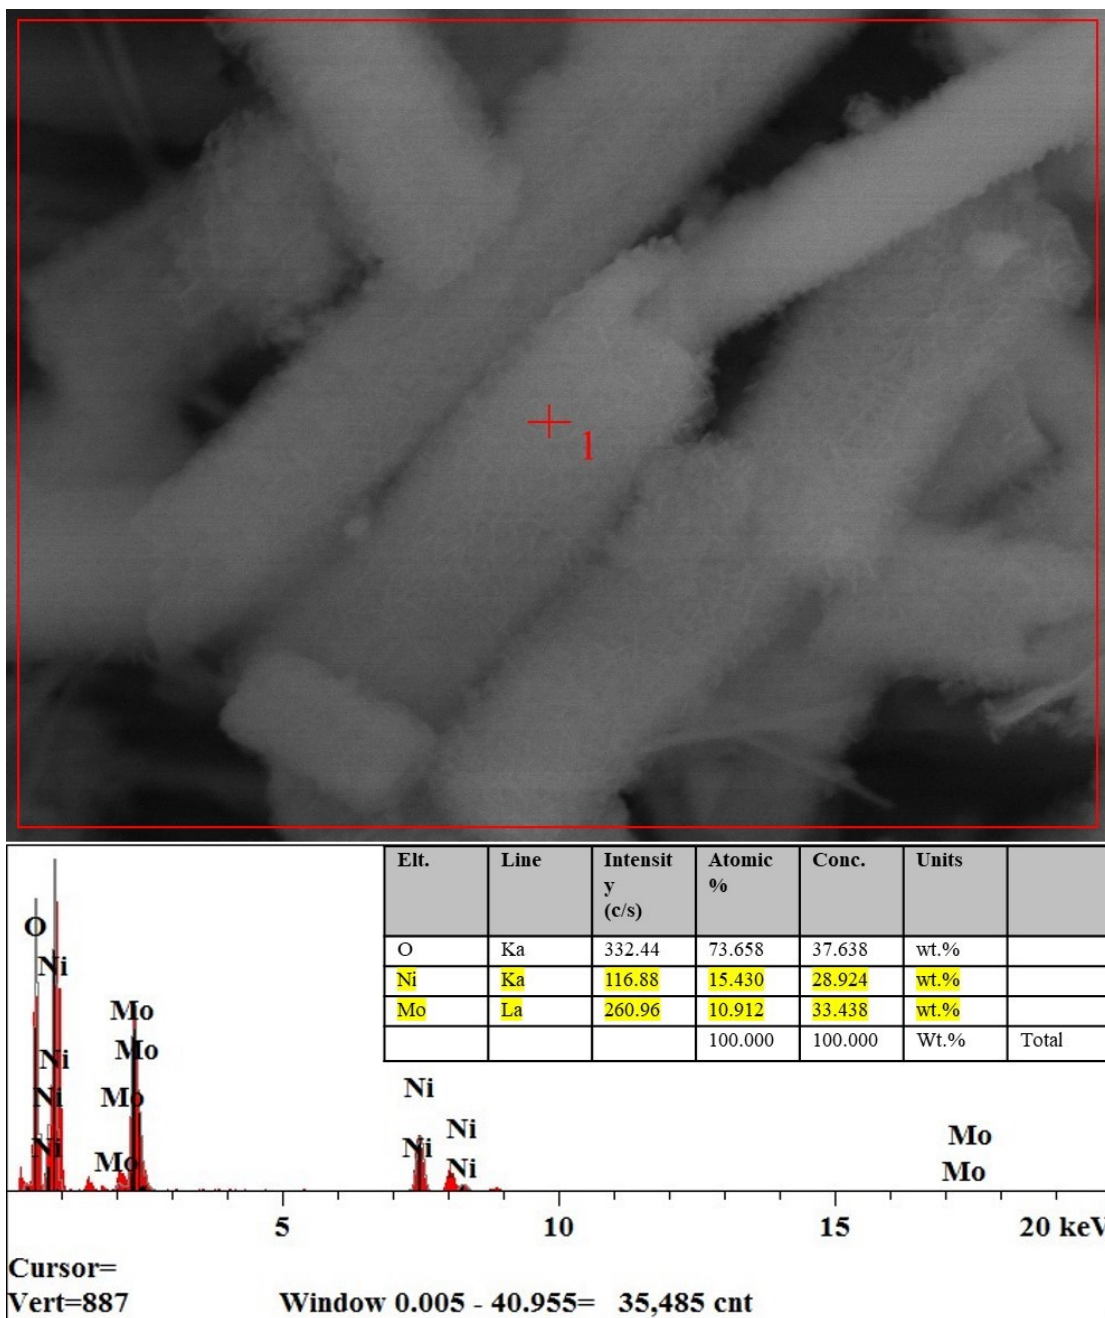

Fig. S1 EDS analysis of Ni/Mo-Precursor.

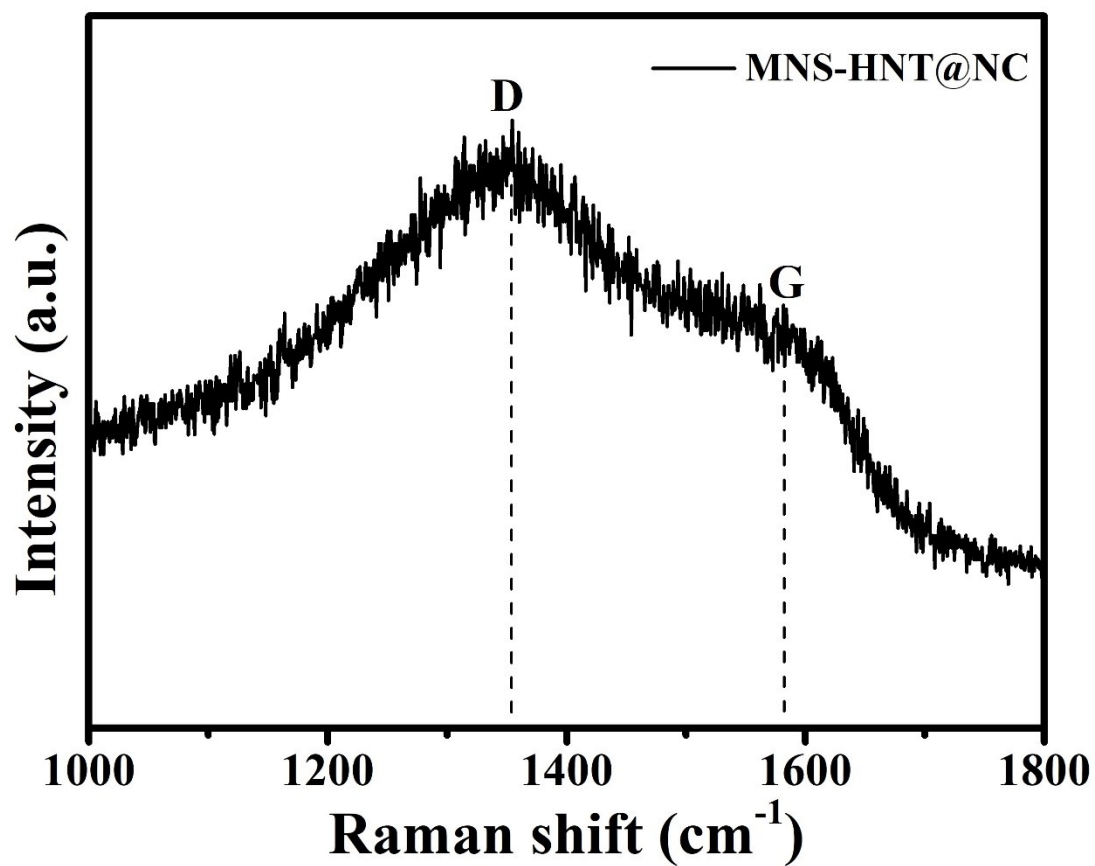

Fig. S2 Raman spectrum of MNS-HNT@NC

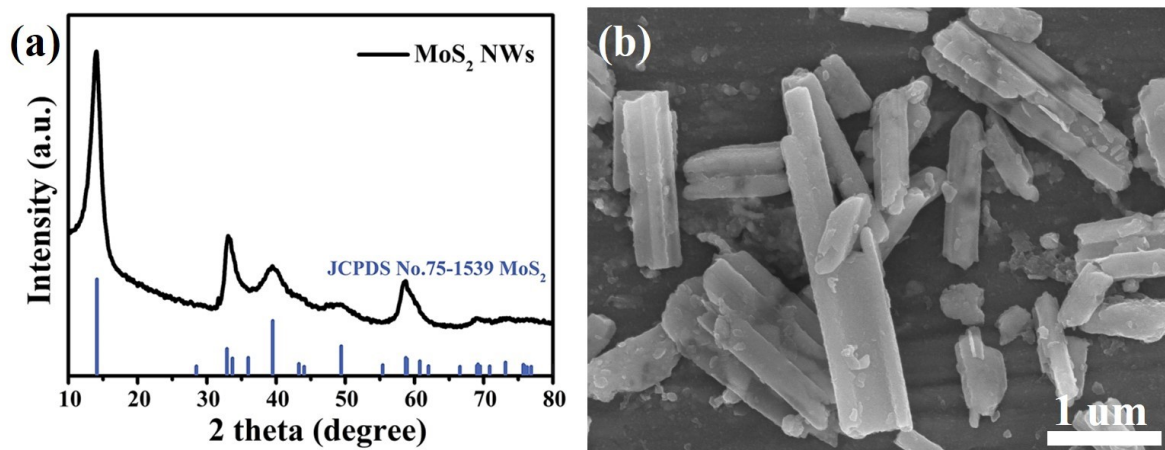

Fig. S3 (a) XRD pattern and (b) SEM image of MoS<sub>2</sub> NWs.

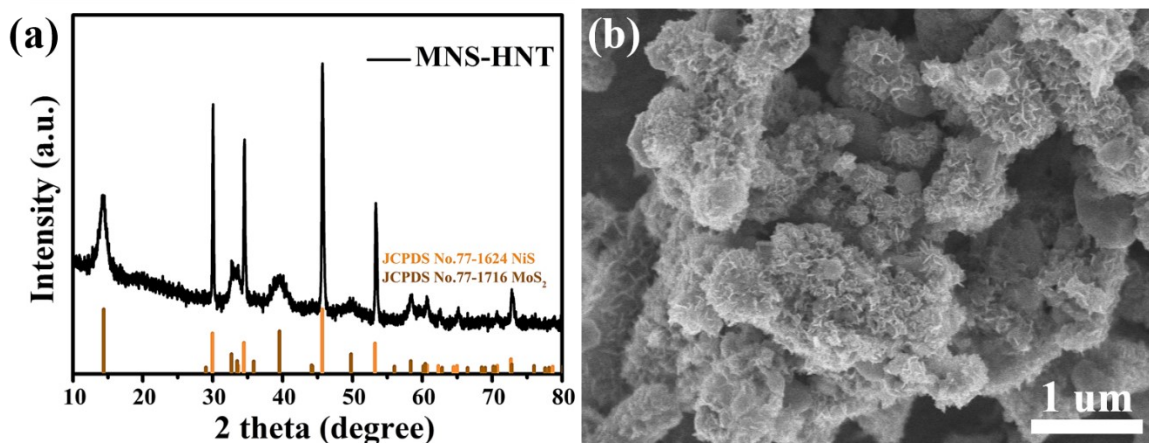

Fig. S4 (a) XRD pattern and (b) SEM image of MNS-HNT.

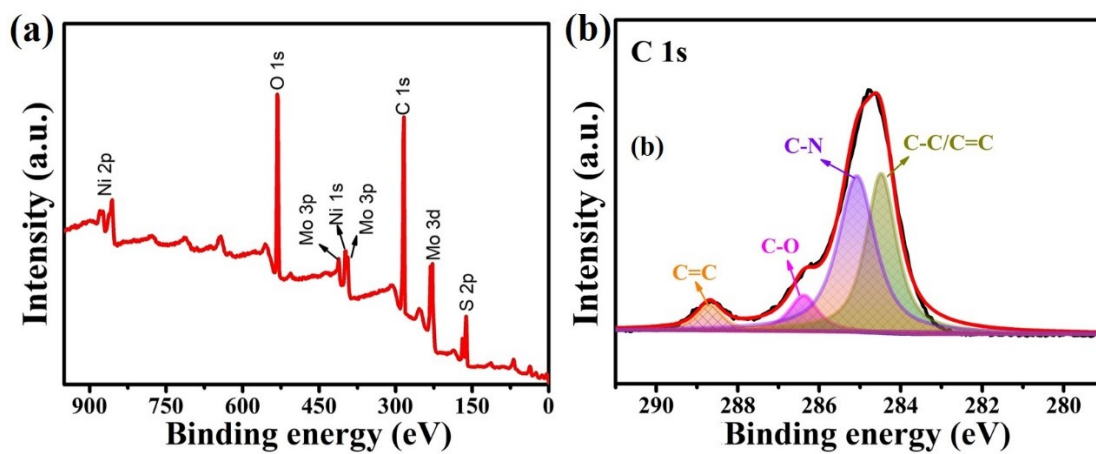

Fig. S5 (a) XPS survey spectrum, and (b) the corresponding C 1s of MNS-HNT@NC

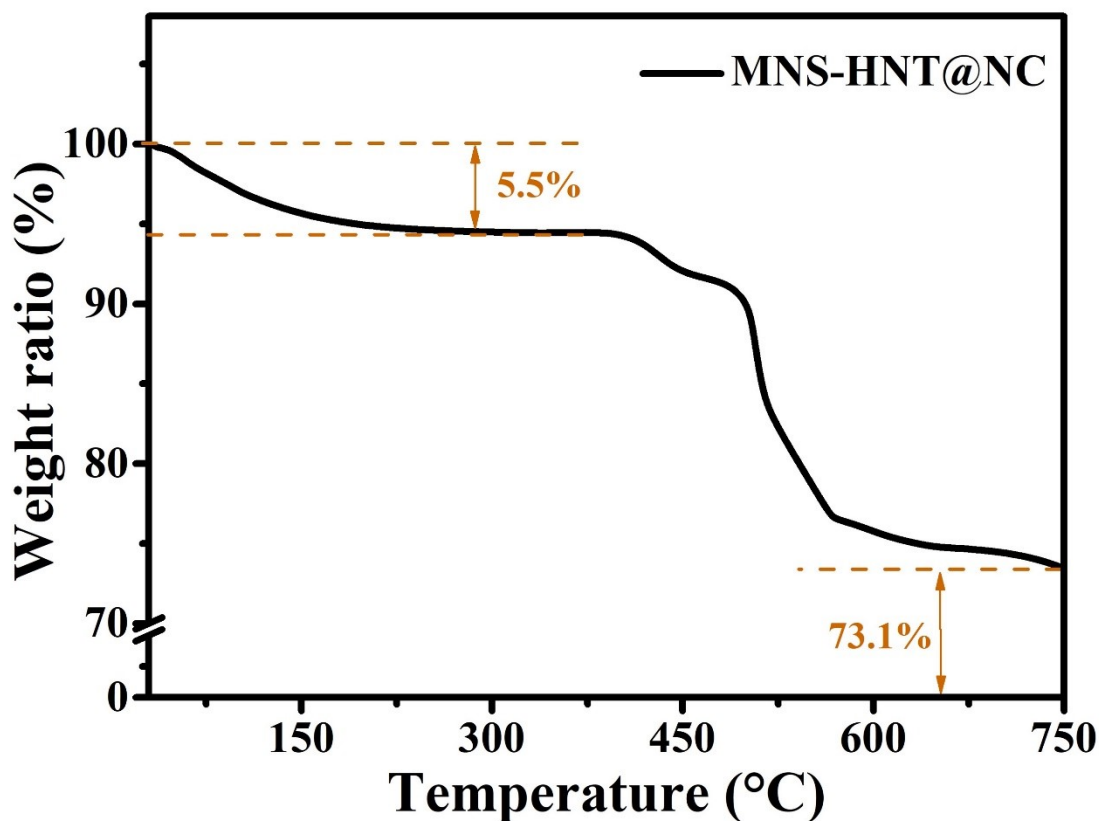

Fig. S6 TGA curve of MNS-HNT@NC tested under air flow.

**Calculation method for determining the content in the MNS-HNT@NC:**

TGA curves of MNS-HNT@NC from 30 °C to 800 °C. During the TGA test in airflow, NiS and MoS<sub>2</sub> can be converted to the corresponding high-temperature stable phase, NiO and MoO<sub>3</sub>, respectively, on the chemical reactions of NiS+O<sub>2</sub> → NiO+SO<sub>2</sub>; MoS<sub>2</sub>+O<sub>2</sub>→MoO<sub>3</sub>+SO<sub>2</sub>. The EDS result (Fig. S1) shows that the atomic ratio of Ni to Mo atoms in the Ni/Mo-precursor was 15.43%:10.912%, and the NiS/MoS<sub>2</sub> and NiO/MoO<sub>3</sub> are derived from Ni/Mo-precursor. As a result, the mole ratio of Ni to Mo in the sample after the TGA test should be 1.414:1. Based on the molecule weight of NiS and MoS<sub>2</sub>; NiO and MoO<sub>3</sub>, the mass of each component can be calculated, respectively:

$$m_{NiO} = \frac{1.414 \times 74.1}{1.414 \times 74.1 + 144} \times 73.1\%m = 30.8\%m$$

$$m_{MoO_3} = \frac{144}{1.414 \times 74.1 + 144} \times 73.1\%m = 42.3\%m$$

$$m_{NiS} = \frac{90.7}{74.1} \times m_{NiO} = 37.7\%m$$

$$m_{MoS_2} = \frac{160}{144} \times m_{MoO_3} = 47.0\%m$$

$$m_{moisture} = 5.5\%m$$

$$m_C = m - m_{NiS} - m_{MoS_2} - m_{moisture} = 9.8\%m$$

After deducting the quality of water, the proportions of each component are as follows:

$$\text{Ratio of NiS} = \frac{m_{NiS}}{m - m_{moisture}} \times 100 = 39.9\%$$

$$\text{Ratio of MoS}_2 = \frac{m_{MoS_2}}{m - m_{moisture}} \times 100 = 49.7\%$$

$$\text{Ratio of NC} = \frac{m_C}{m - m_{moisture}} \times 100 = 10.4\%$$

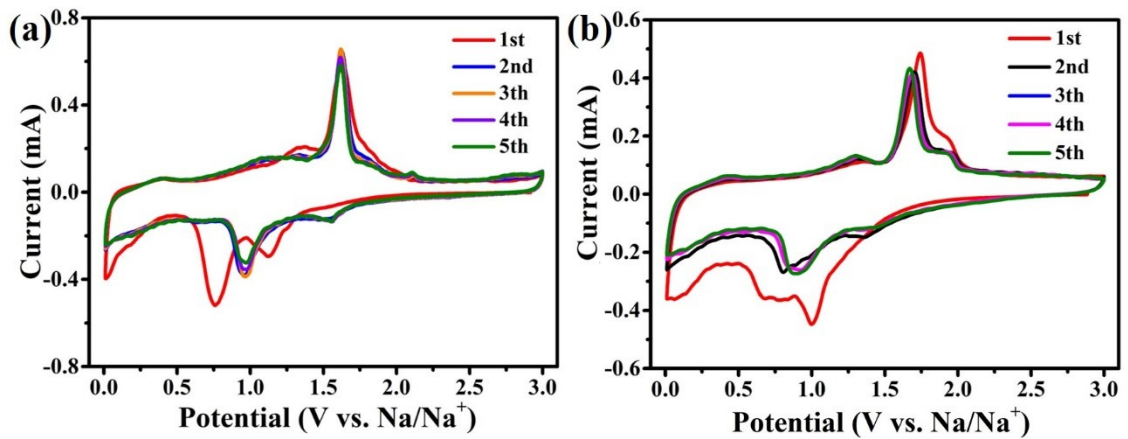

**Fig. S7** CV curves of MNS-HNT@NC: (a) in Ether-based electrolyte; (b) in Ester-based electrolyte.

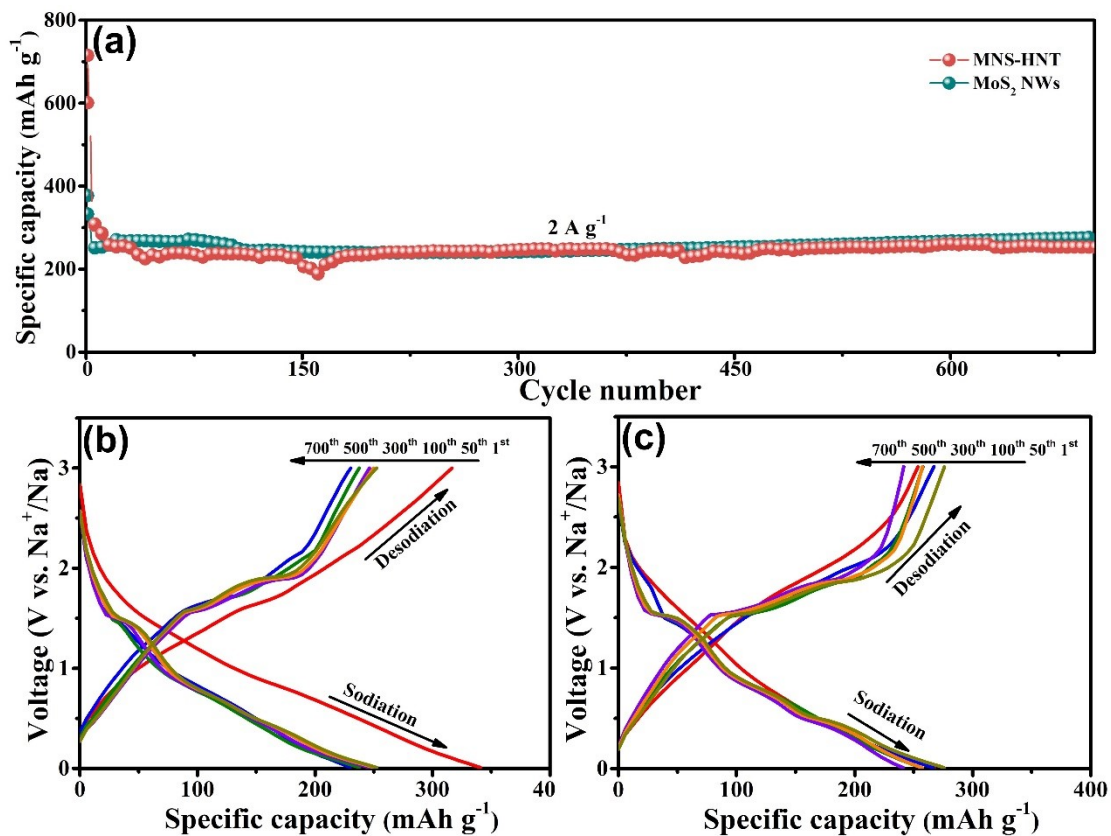

**Fig. S8** (a) Long-term cycling performance of MNS-HNT and MoS<sub>2</sub> NWs at 2 A g<sup>-1</sup>; the charge/discharge curves at of MNS-HNT (b) and MoS<sub>2</sub> NWs (c) different cycle.

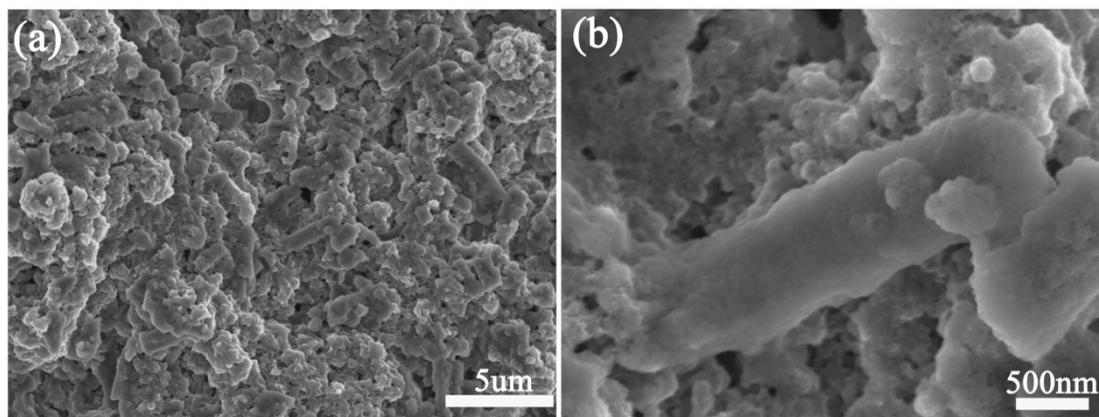

**Fig. S9** SEM images of the MNS-HNT@NC anode after long-term cycling.

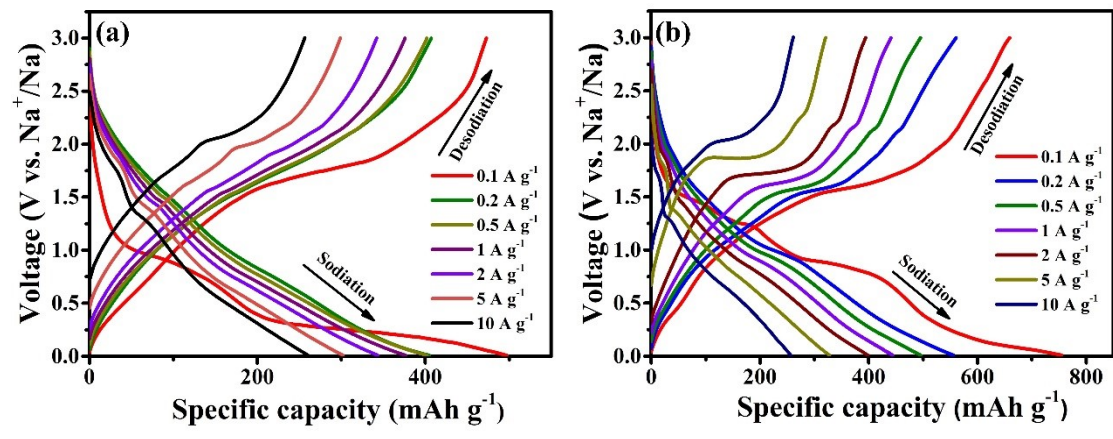

**Fig. S10** The charge/discharge curves at different current densities of MoS<sub>2</sub> NWs (a), and MNS-HNT (b).

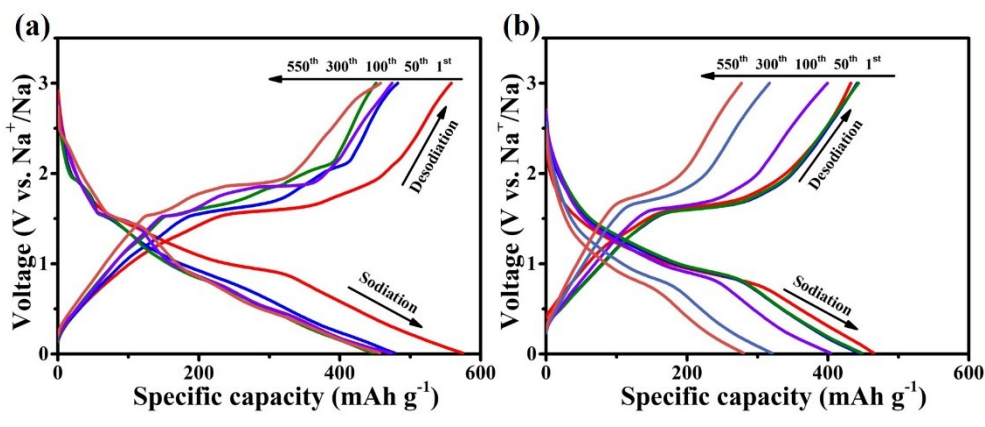

**Fig. S11** Discharge/charge curves of MNS-HNT@NC at 1 A g<sup>-1</sup>: (a) Ether-based electrolyte (b) Ester-based electrolyte.



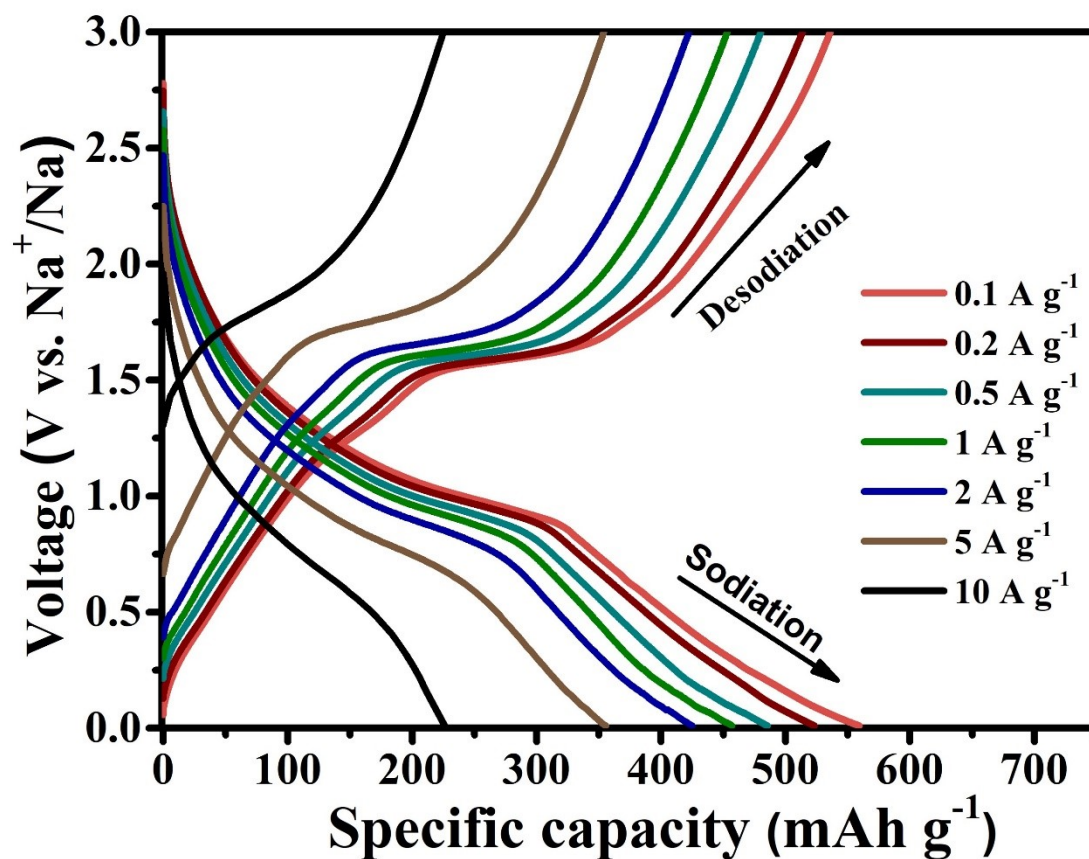

Fig. S12 The charge/discharge curves at different current densities of Ester-based electrolyte.

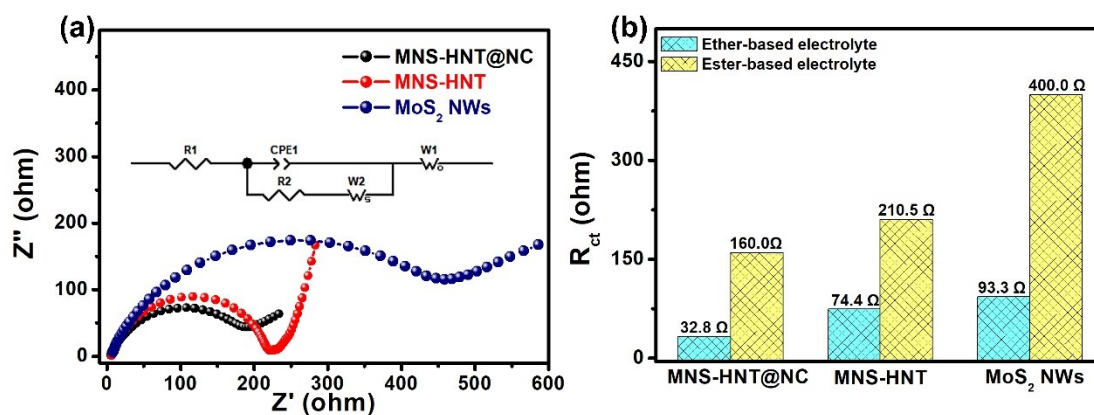

Fig. S13 (a) Nyquist plots from EIS of electrodes tested in Ester-based electrolyte, (b) the  $R_{ct}$  of each electrode in different electrolytes.

**Table S1. Comparison of MoS<sub>2</sub>-NiS@NC with some related works for SIBs.**

| Materials                                                          | Electrolyte | ICE   | Capacity (mAh g <sup>-1</sup> )                                        | References |
|--------------------------------------------------------------------|-------------|-------|------------------------------------------------------------------------|------------|
| MNS-HNT@NC                                                         | Ether-based | 94%   | 391 mAh g <sup>-1</sup> after<br>700 cycles at 2 A g <sup>-1</sup>     | This work  |
| MoS <sub>2</sub> /Ni <sub>3</sub> S <sub>2</sub> @MoS <sub>2</sub> | Ester-based | 77%   | 462 mA g <sup>-1</sup> after<br>400 cycles at 2 A g <sup>-1</sup>      | [40]       |
| NiS@NCNT MSHMs                                                     | Ester-based | 58.3% | 289.8 mAh g <sup>-1</sup> after<br>500 cycles at 1 A g <sup>-1</sup>   | [41]       |
| NiS <sub>2</sub> NP/p-CNF                                          | Ester-based | 78%   | 140 mAh g <sup>-1</sup> after<br>1000 cycles at 2 A g <sup>-1</sup>    | [42]       |
| NiS/GNS                                                            | Ester-based | 77.2% | 483 mAh g <sup>-1</sup> after<br>100 cycles at 0.2 A g <sup>-1</sup>   | [43]       |
| NiS <sub>2</sub> /NC                                               | Ester-based | 73.6% | 356.2 mAh g <sup>-1</sup> after<br>300 cycles at 0.5 A g <sup>-1</sup> | [44]       |
| MoS <sub>2</sub> @C-700                                            | Ester-based | 79%   | 351.6 mAh g <sup>-1</sup> after<br>200 cycles at 1 A g <sup>-1</sup>   | [45]       |
| MoS <sub>2</sub> /C-2.5                                            | Ester-based | 78.9% | 400 mAh g <sup>-1</sup> after<br>300 cycles at 0.5 A g <sup>-1</sup>   | [46]       |
| MoS <sub>2</sub> @C-CMC                                            | Ester-based | 79.4% | 286 mAh g <sup>-1</sup> after<br>100 cycles at 0.08 A g <sup>-1</sup>  | [47]       |
| tulip-MoS <sub>2</sub> /NG                                         | Ester-based | 55%   | 151 mAh g <sup>-1</sup> after<br>1000 cycles at 5 A g <sup>-1</sup>    | [48]       |
| NiS/MoS <sub>2</sub> /C                                            | Ester-based | 80.2% | 335 mAh g <sup>-1</sup> after<br>200 cycles at 1 A g <sup>-1</sup>     | [49]       |
